# Supplementary material for: Genetic Mapping of the HLA1 Locus Causing Hybrid Lethality in Nicotiana Interspecific Hybrids
Source: MDPI journal article supplement (doi:10.3390/plants10102062), 2021-09-30
Supplement: s1 [file s1]

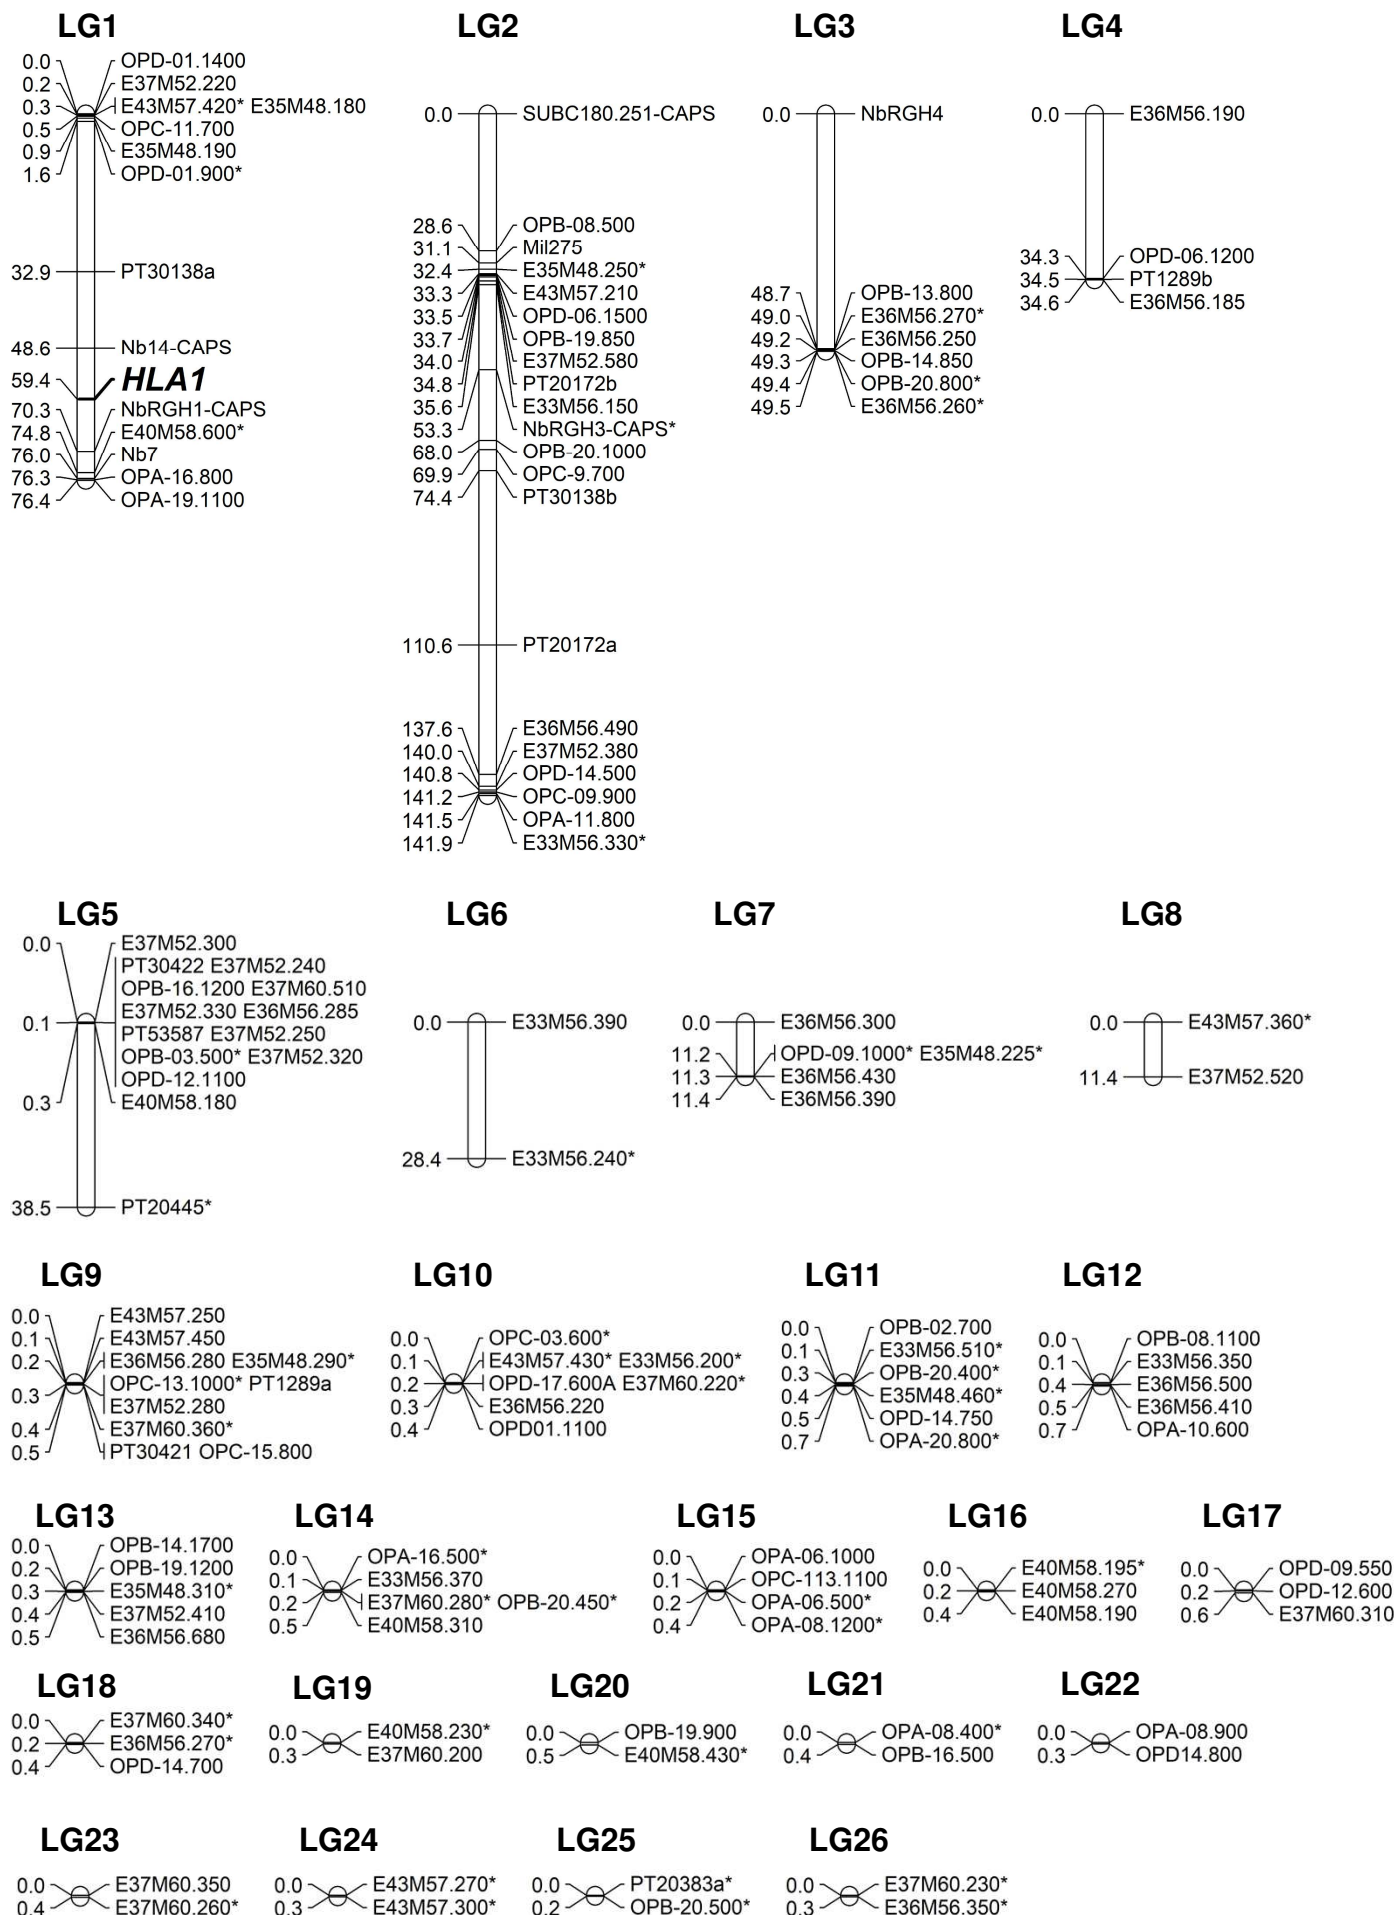

**Figure S1.** Linkage map derived from the F<sub>2</sub> population from the cross *N. debneyi* × *N. fragrans*. The distance is in cM. DNA markers with an asterisk are those that deviated from Mendelian ratios.

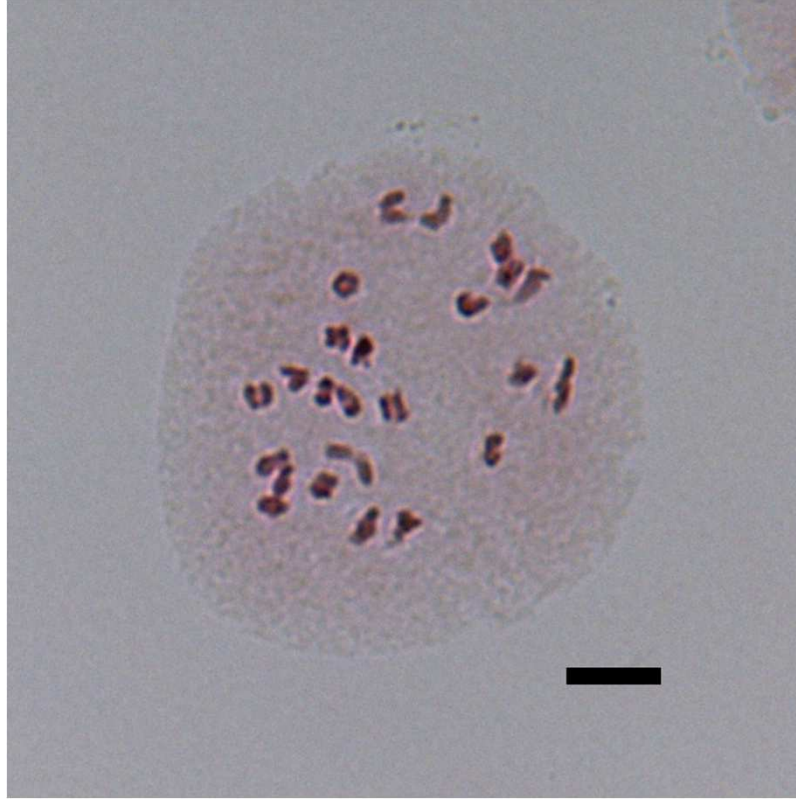

**Figure S2.** Chromosome pairing in a pollen mother cell of an  $F_1$  hybrid from the cross *N. debneyi*  $\times$  *N. fragrans*. Twenty-four bivalents were observed at metaphase I of meiosis. Scale bar indicates 10  $\mu\text{m}$ .

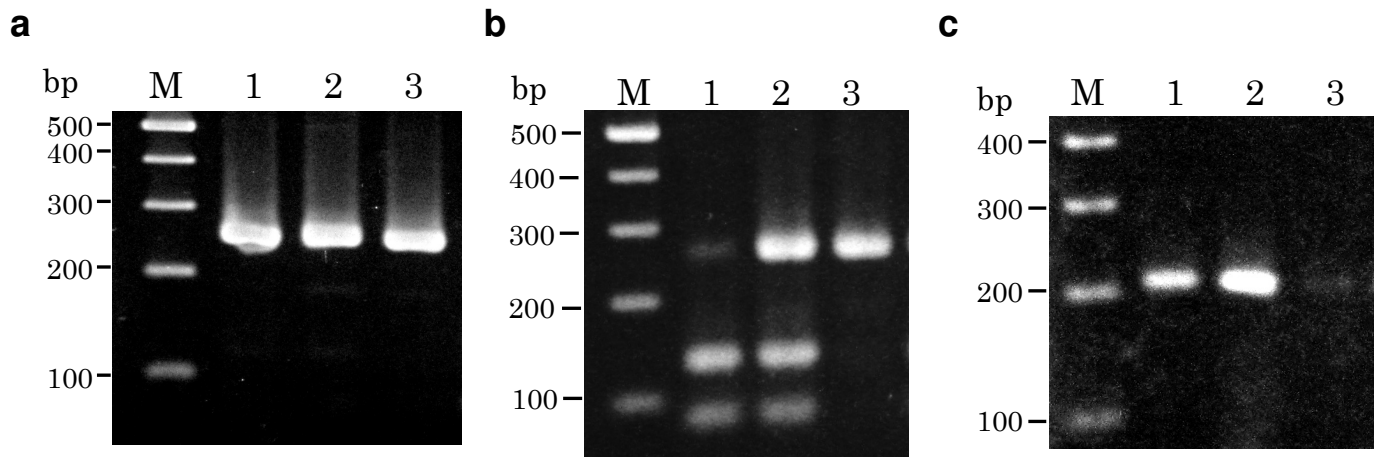

**Figure S3.** DNA markers linked to blue-mold resistance. **a** SCAR marker SUBC180.251. **b** CAPS marker SUBC180.251-CAPS. **c** SCAR marker Mil275. Lanes: M, size marker (GeneRuler DNA ladder mix; Thermo Fisher Scientific, Tokyo, Japan); 1, *N. debneyi*; 2, F<sub>1</sub> hybrid between *N. debneyi* and *N. fragrans*; 3, *N. fragrans*.
